# Supplementary material for: Purification and characterization of a thaumatin-like protein-1 with polyphenol oxidase activity found in Prunus mume
Source: Royal Society of Chemistry journal article supplement (doi:10.1039/d0ra05659f), 2020-01-01
Supplement: d0ra05659f1.pdf [file d0ra05659f1.pdf]

### Supplementary Figure Captions

**Fig. S1.** Measurement of isoelectric point of TLP-1.

**Fig. S2.** Fluorescence emission spectra of TLP-1 from *Prunus mume*.

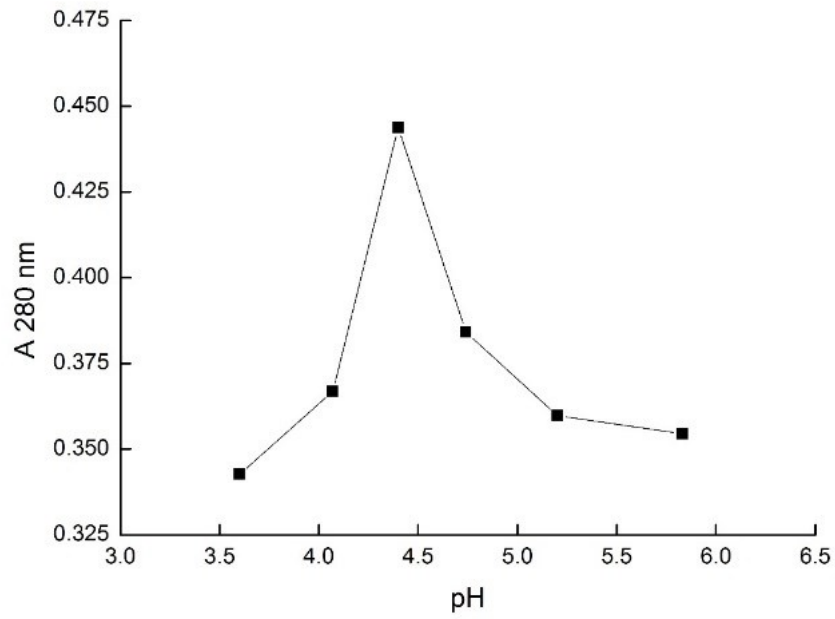

**Fig. S1.** Measurement of isoelectric point of TLP-1.

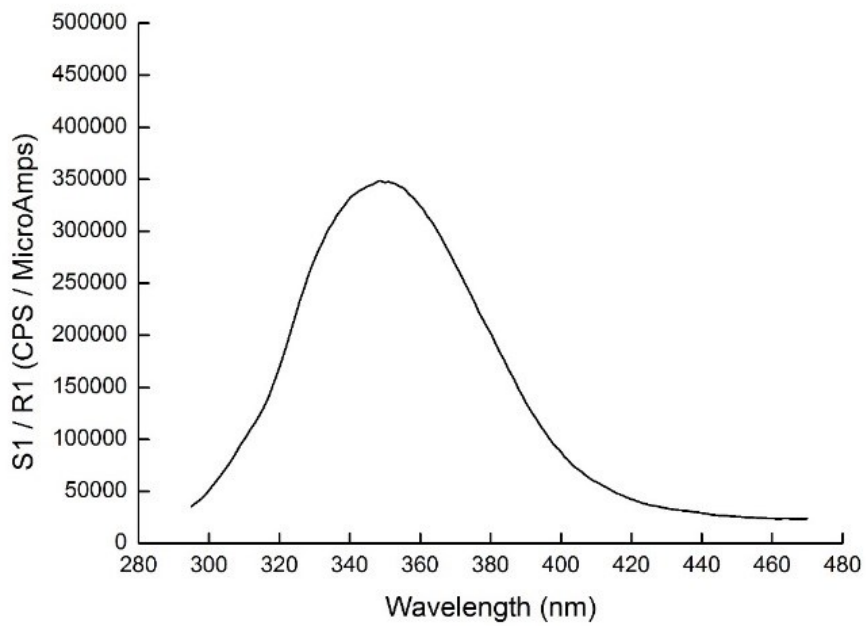

**Fig. S2.** Fluorescence emission spectra of TLP-1 from *Prunus mume*.
